# Supplementary material
Source: Research Square preprint supplement (doi:10.21203/rs.3.rs-352165/v1)
Supplement: Supplementary file 1 [file 81e54a030e94e6cfdbbc22aa.docx]

**KT survey tables**

**Table 1**: Median response (IQR) and factor loadings for the five factors identified in the exploratory factor analysis for the broad nursing cohort. Only loadings greater than 0.3* are displayed. Cronbach’s alpha (α) is reported for each factor.

| Question number** | Median response (IQR) | **Factor 1:**  **Knowledge and beliefs about paediatric sepsis and pathway application (α= 0.89)** | **Factor 2:**  **Social influences when recognising, escalating and managing paediatric sepsis**  **(α = 0.83)** | **Factor 3:**  **Beliefs about capability and skills delivering treatment for paediatric sepsis**  **(α = 0.84)** | **Factor 4:**  **Beliefs about capability and behaviour in recognising, escalating and managing paediatric sepsis (α = 0.87)** | **Factor 5:**  **Environmental context and resources in the ED for recognising, escalating and managing paediatric sepsis (α = 0.74)** |
| --- | --- | --- | --- | --- | --- | --- |
| 24 | 6(5-6) | - | - | - | 0.70 | - |
| 26 | 6(5-6) | - | - | - | 0.63 | - |
| 27 | 6(6-7) | - | - | - | 0.60 | - |
| 28 | 5(3-6) | - | - | 0.75 | - | - |
| 29 | 6(5-6) | - | - | 0.92 | - | - |
| 30 | 6(5-7) | - | - | 0.50 | - | - |
| 31 | 6(6-7) | - | 0.66 | - | - | - |
| 33 | 6(6-7) | - | 0.70 | - | - | - |
| 35 | 6(5-6) | - | - | - | - | 0.48 |
| 36 | 6(6-6) | - | 0.70 | - | - | - |
| 37 | 6(6-7) | - | 0.81 | - | - | - |
| 38 | 6(5-6) | - | - | - | 0.49 | - |
| 39 | 6(5-6) | - | - | - | - | 0.55 |
| 40 | 6(5-6) | - | - | - | - | 0.49 |
| 41 | 6(6-7) | 0.53 | - | - | - | - |
| 43 | 6(5-6) | 0.58 | - | - | - | - |
| 44 | 6(6-7) | 0.54 | - | - | - | - |
| 47 | 6(6-7) | 0.77 | - | - | - | - |
| 48 | 6(6-7) | 0.77 | - | - | - | - |
| 49 | 7(6-7) | 0.80 | - | - | - | - |
| 50 | 6(6-7) | 0.68 | - | - | - | - |

* To ease interpretation, only factor loadings greater than or equal to 0.3 are displayed, corresponding to the cut-off used to determine whether an item contributed to a factor, see **Supplementary Material 4 for details.**

** The questions corresponding to each question number can be found in **Supplementary Material 3**.

**Table 2**: **Respondent characteristics**

| **Characteristic** | **N = 534***1* **(% of total sample)** |
| --- | --- |
| Hospital |  |
| 1 | 27 (5.1%) |
| 2 | 26 (4.9%) |
| 3 | 66 (12%) |
| 4 | 94 (18%) |
| 5 | 19 (3.6%) |
| 6 | 70 (13%) |
| 7 | 16 (3.0%) |
| 8 | 51 (9.6%) |
| 9 | 6 (1.1%) |
| 10 | 33 (6.2%) |
| 11 | 41 (7.7%) |
| 12 | 35 (6.6%) |
| 13 | 33 (6.2%) |
| 14 | 17 (3.2%) |
| Nursing role * | |
| Clinical facilitator | 13 (2.4%) |
| Enrolled nurse | 4 (0.7%) |
| Endorsed enrolled nurse | 13 (2.4%) |
| Registered nurse | 379 (71%) |
| Clinical nurse | 105 (20%) |
| Nurse unit manager | 1 (0.2%) |
| Nurse Educator | 7 (1.3%) |
| Clinical nurse consultant | 10 (1.9%) |
| Nurse practitioner | 8 (1.5%) |
| Research nurse | 5 (0.9%) |
| Other | 3 (0.6%) |
| Age |  |
| 20-25 years | 72 (13%) |
| 26-30 years | 151 (28%) |
| 31-35 years | 94 (18%) |
| 36-40 years | 66 (12%) |
| 41-50 years | 93 (17%) |
| 51-60 years | 49 (9.2%) |
| 61+years | 9 (1.7%) |
| Years of nursing experience | |
| 6-11 months | 19 (3.6%) |
| 1-3 years | 84 (16%) |
| 4-6 years | 138 (26%) |
| 7-9 years | 84 (16%) |
| 10+ years | 207 (39%) |
| Unknown | 2 |
| Years of paediatric experience | |
| 6-11 months | 69 (13%) |
| 1-3 years | 149 (28%) |
| 4-6 years | 125 (23%) |
| 7-9 years | 76 (14%) |
| 10+ years | 115 (22%) |
| Years of ED experience |  |
| 6-11 months | 45 (8.5%) |
| 1-3 years | 149 (28%) |
| 4-6 years | 130 (25%) |
| 7-9 years | 81 (15%) |
| 10+ years | 124 (23%) |
| Unknown | 5 |
| Self-reported frequency of exposure to paediatric sepsis |  |
| Weekly | 88 (16%) |
| Fortnightly | 101 (19%) |
| Monthly | 166 (31%) |
| Six monthly | 71 (13%) |
| Yearly | 13 (2.4%) |
| Don’t know | 95 (18%) |
| *1*Statistics presented: n (%) | |

* Multiple responses were permitted

**Table 3: Multivariate Odds ratios (OR), 95% confidence intervals (95% CI) and p-values of the effects of the included variables on sepsis knowledge scores.**

| **Characteristic** | **OR***1* | **95% CI***1* | **p-value** |
| --- | --- | --- | --- |
| Knowledge and beliefs | 1.09 | 1.03, 1.15 | 0.001 |
| Social influences | 0.97 | 0.92, 1.02 | 0.261 |
| Beliefs about capability and skills: Treatment | 1.21 | 1.14, 1.27 | <0.001 |
| Beliefs about capability and behaviour:  Recognition, escalation, and management | 1.04 | 0.98, 1.10 | 0.193 |
| Environmental context and resources | 1.05 | 1.01, 1.10 | 0.015 |
| Age |  |  |  |
| 20-25 years | — | — |  |
| 26-30 years | 1.02 | 0.87, 1.19 | 0.834 |
| 31-35 years | 0.91 | 0.76, 1.09 | 0.301 |
| 36-40 years | 0.99 | 0.81, 1.20 | 0.900 |
| 41-50 years | 0.87 | 0.72, 1.05 | 0.143 |
| 51-60 years | 0.92 | 0.73, 1.16 | 0.482 |
| 61+ years | 1.12 | 0.74, 1.69 | 0.595 |
| Length of time working in paediatrics |  |  |  |
| 6-11 months | — | — |  |
| 1-3 years | 1.27 | 1.08, 1.49 | 0.004 |
| 4-6 years | 1.18 | 0.99, 1.40 | 0.069 |
| 7-9 years | 1.28 | 1.05, 1.56 | 0.013 |
| 10+ years | 1.34 | 1.10, 1.63 | 0.004 |
| Frequency of caring for a child with sepsis? |  |  |  |
| Weekly | — | — |  |
| Fortnightly | 1.00 | 0.85, 1.16 | 0.954 |
| Monthly | 1.09 | 0.94, 1.26 | 0.241 |
| Six monthly | 1.12 | 0.94, 1.34 | 0.203 |
| Yearly | 1.17 | 0.84, 1.61 | 0.350 |
| Don’t know | 0.99 | 0.84, 1.17 | 0.938 |
| Sepsis nurse funding | 1.11 | 1.04, 1.18 | 0.002 |
| Total number of clinicians | 0.98 | 0.91, 1.04 | 0.484 |
| Hospital SD | 0.07 |  |  |
| *1*OR = Odds Ratio, CI = Confidence Interval; Hospital SD = the standard deviation for the random intercept for hospital. | | | |
